# Supplementary material for: EQUIFAT: A novel scoring system for the semi-quantitative evaluation of regional adipose tissues in Equidae
Source: PLOS journal article supplement (doi:10.1371/journal.pone.0173753), 2017-03-15
Supplement: S1 (10.1371/journal.pone.0173753.s001) [file journal.pone.0173753.s001]

# EQUIFAT: Regional adipose tissue scoring system

| OMENTAL FAT                                                                                            |                                                                                                             |                                                                                      |
|--------------------------------------------------------------------------------------------------------|-------------------------------------------------------------------------------------------------------------|--------------------------------------------------------------------------------------|
| Evaluate ~30cm of omentum extending distally from the midpoint of the greater curvature of the stomach |                                                                                                             |                                                                                      |
| Score                                                                                                  | Descriptor                                                                                                  | Exemplar                                                                             |
| 1                                                                                                      | No or minimal fat visible                                                                                   |    |
| 2                                                                                                      | Fat in immediate vicinity of the gastroepiploic vessels (GEVs) but vessels still clearly visible.           |    |
| 3                                                                                                      | Distinct fat deposits around and beginning to fill the spaces between GEVs. GEVs partially obscured by fat. |   |
| 4                                                                                                      | Extensive accumulations of fat largely obscuring and filling the spaces between most GEVs.                  |  |
| 5                                                                                                      | Omental peritoneum and GEVs completely obscured by fat.                                                     |  |

| MESENTERIC FAT                                                                                               |                                                                                                                     |                                                                                       |
|--------------------------------------------------------------------------------------------------------------|---------------------------------------------------------------------------------------------------------------------|---------------------------------------------------------------------------------------|
| Evaluate ~30cm of mesentery extending distally from the serosal margin of a ~0.5 m loop of proximal jejunum. |                                                                                                                     |                                                                                       |
| Score                                                                                                        | Descriptor                                                                                                          | Exemplar                                                                              |
| 1                                                                                                            | No or minimal fat visible.                                                                                          |    |
| 2                                                                                                            | Fat in the immediate vicinity of the superior mesenteric vessels (SMVs) but arterial arcades still clearly visible. |    |
| 3                                                                                                            | Distinct fat deposits around and beginning to fill the spaces between SMVs. SMVs partially obscured by fat.         |   |
| 4                                                                                                            | Extensive accumulations of fat largely obscuring and filling spaces between most arcades of the SMVs.               |  |
| 5                                                                                                            | Mesenteric peritoneum, SMVs completely obscured by fat.                                                             |  |

| EPICARDIAL FAT      |                                                                                                                                                                                                  |                                                                                      |
|---------------------|--------------------------------------------------------------------------------------------------------------------------------------------------------------------------------------------------|--------------------------------------------------------------------------------------|
| Evaluate left heart |                                                                                                                                                                                                  |                                                                                      |
| Score               | Descriptor                                                                                                                                                                                       | Exemplar                                                                             |
| 1                   | No or minimal fat visible                                                                                                                                                                        |    |
| 2                   | Fat limited to immediate vicinity of coronary groove (CG) and paracornial interventricular branch of left coronary artery (PIBLCA). Entire PIBLCA visible. Fat 'level' with adjacent myocardium. |    |
| 3                   | Fat 'tendrils' extend from vicinity of PIBLCA across myocardium. Proximal limits of PIBLCA partially obscured by fat. Fat minimally protruding over myocardial surface.                          |    |
| 4                   | Lobular fat emanating from CG & PIBLCA only distal PIBLCA visible. Fat protruding above myocardium but ≥50% of ventricular myocardium visible.                                                   |   |
| 5                   | CG & PIBLCA completely obscured by lobular Fat in folded bulges with < 50% ventricular myocardium visible.                                                                                       |  |

| RUMP FAT                                              |                                                                                                  |                                                                                       |
|-------------------------------------------------------|--------------------------------------------------------------------------------------------------|---------------------------------------------------------------------------------------|
| Evaluate dorsal rump from point of tailhead over loin |                                                                                                  |                                                                                       |
| Score                                                 | Descriptor                                                                                       | Exemplar                                                                              |
| 1                                                     | No / minimal fat cover.<br>Flesh clearly visible.<br>( <b>&lt;10% fat cover</b> )                |    |
| 2                                                     | Visible fat on tailhead, flesh remains visible lower down rump<br>( <b>10 – 25% fat cover</b> ). |    |
| 3                                                     | Small patches of flesh may remain visible.<br>( <b>25 – 50% fat cover</b> ).                     |    |
| 4                                                     | Flesh not clearly visible, fat may have bulging appearance.<br>( <b>50 – 75% fat cover</b> ).    |   |
| 5                                                     | Fat appears thick and more protruding.<br>( <b>&gt;75% fat cover</b> )                           |  |

| NUCHAL CREST FAT: Depth at craniocaudal midpoint |         |         |         |          |     |
|--------------------------------------------------|---------|---------|---------|----------|-----|
| Score                                            | 1       | 2       | 3       | 4        | 5   |
| Depth (cm)                                       | 0 – 2.9 | 3 – 5.9 | 6 – 8.9 | 9 – 11.9 | ≥12 |

| ABDOMINAL RETROPERITONEAL FAT: Cr/Cau midpoint |         |         |         |         |    |
|------------------------------------------------|---------|---------|---------|---------|----|
| Score                                          | 1       | 2       | 3       | 4       | 5  |
| Depth (cm)                                     | 0 – 1.9 | 2 – 3.9 | 4 – 5.9 | 6 – 7.9 | ≥8 |
